# Supplementary material for: An Fe stabilized metallic phase of NiS2for the highly efficient oxygen evolution reaction
Source: Royal Society of Chemistry journal article supplement (doi:10.1039/c9nr07832k), 2019-01-01
Supplement: c9nr07832k1.pdf [file c9nr07832k1.pdf]

## Supplemental Materials for

### Fe stabilized metallic phase of NiS<sub>2</sub> for highly efficient oxygen evolution reaction

Xingyu Ding,<sup>a</sup> Weiwei Li,<sup>b</sup> Haipeng Kuang,<sup>a</sup> Mei Qu,<sup>a</sup> Meiyang Cui,<sup>a</sup> Chenhao Zhao,<sup>a</sup> Dong-Chen Qi,<sup>d</sup> Freddy E. Oropeza<sup>\*c</sup> and Kelvin H. L. Zhang<sup>\*a</sup>

*<sup>a</sup>State Key Laboratory of Physical Chemistry of Solid Surfaces, College of Chemistry and Chemical Engineering, Xiamen University, Xiamen 361005, P.R. China.*

*<sup>b</sup>Department of Materials Science & Metallurgy, University of Cambridge, 27 Charles Babbage Road, Cambridge, CB3 0FS, United Kingdom*

*<sup>c</sup>Laboratory of Inorganic Materials Chemistry, Department of Chemical Engineering and Chemistry, Eindhoven University of Technology, P. O. Box 513, 5600MB Eindhoven, The Netherlands*

*<sup>d</sup>School of Chemistry, Physics and Mechanical Engineering, Queensland University of Technology, Brisbane, Queensland 4001, Australia*

Email: [freddyoropeza@gmail.com](mailto:freddyoropeza@gmail.com) and [kelvinzhang@xmu.edu.cn](mailto:kelvinzhang@xmu.edu.cn)

**Table S1** The actual doped Fe concentrations in  $\text{Fe}_x\text{Ni}_{1-x}\text{S}_2$  measured by inductively coupled plasma mass spectrometry (ICP-MS). The actual x values are calculated using

$$x = \frac{\rho_{\text{Fe}}}{M_{\text{Fe}}} \div \left( \frac{\rho_{\text{Fe}}}{M_{\text{Fe}}} + \frac{\rho_{\text{Ni}}}{M_{\text{Ni}}} \right)$$

the following equation: where  $\rho$  represents the concentration of metal element in the solution obtained from ICP-MS,  $M_{\text{Fe}} = 55.85 \text{ g mol}^{-1}$ ,  $M_{\text{Ni}} = 58.69 \text{ g mol}^{-1}$ .

| x in $\text{Fe}_x\text{Ni}_{1-x}\text{S}_2$ | The concentrations of metal element from ICP-MS |                                          | x in $\text{Fe}_x\text{Ni}_{1-x}\text{S}_2$ from ICP-MS |
|---------------------------------------------|-------------------------------------------------|------------------------------------------|---------------------------------------------------------|
|                                             | $\rho_{\text{Fe}}$ (mg L <sup>-1</sup> )        | $\rho_{\text{Ni}}$ (mg L <sup>-1</sup> ) |                                                         |
| 0                                           | 0                                               | 6.31                                     | 0                                                       |
| 0.05                                        | 0.29                                            | 6.23                                     | 0.046                                                   |
| 0.10                                        | 0.48                                            | 4.72                                     | 0.097                                                   |
| 0.15                                        | 0.66                                            | 3.90                                     | 0.151                                                   |
| 0.20                                        | 1.22                                            | 5.34                                     | 0.194                                                   |

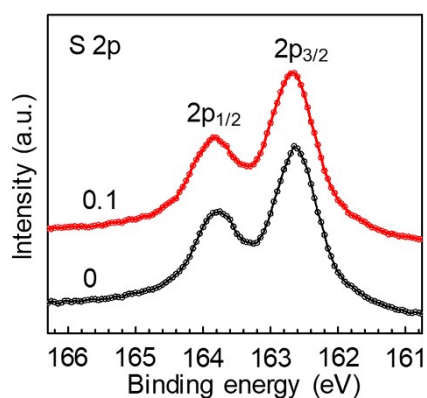

**Fig. S1** S 2p XPS spectra of as-synthesized  $\text{NiS}_2$  and  $\text{Fe}_{0.1}\text{Ni}_{0.9}\text{S}_2$  nanosheets.

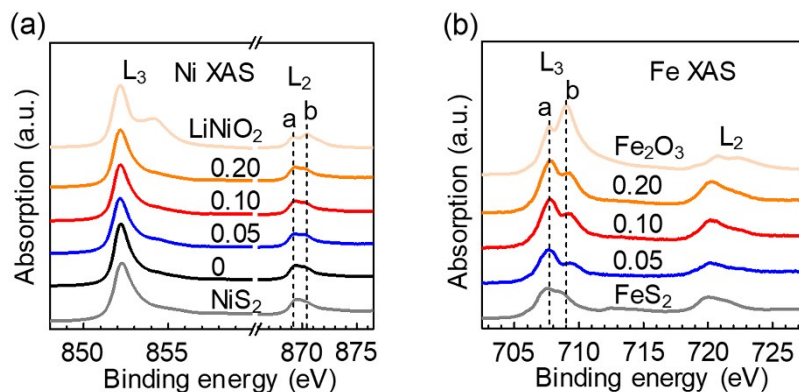

**Fig. S2** (a) Ni L-edge XAS spectra of as-synthesized  $\text{Fe}_x\text{Ni}_{1-x}\text{S}_2$  ( $x=0, 0.05, 0.10$  and  $0.20$ ) along with reference spectra of single crystal  $\text{NiS}_2$  representing  $\text{Ni}^{2+}$  and  $\text{LiNiO}_2$  representing  $\text{Ni}^{3+}$ . (b) Fe L-edge XAS spectra of as-synthesized  $\text{Fe}_x\text{Ni}_{1-x}\text{S}_2$  ( $x=0.05, 0.10$  and  $0.20$ ) along with reference spectra of  $\text{FeS}_2$  representing  $\text{Fe}^{2+}$  and  $\text{Fe}_2\text{O}_3$  representing  $\text{Fe}^{3+}$ . The results suggest oxidation state of Ni and Fe in  $\text{Fe}_x\text{Ni}_{1-x}\text{S}_2$  are consistent with +2.

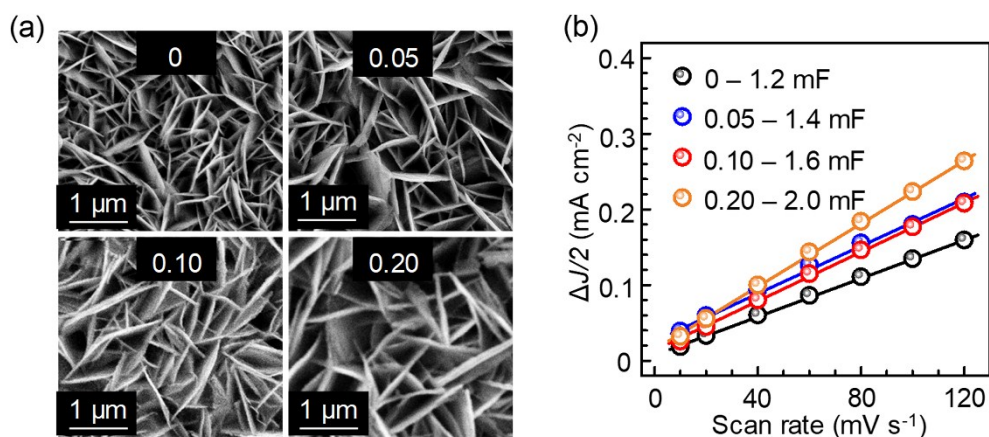

**Fig. S3** (a) SEM images of as-synthesized  $\text{Fe}_x\text{Ni}_{1-x}\text{S}_2$  ( $x=0, 0.05, 0.10$  and  $0.20$ ). (b) Plot of current density v.s. scan rates extracted from Fig. S4; the slope is double layer capacitance ( $C_{dl}$ ) and is proportional to electrochemical active surface area (ECSA). This data suggests all samples have similar ECSA.

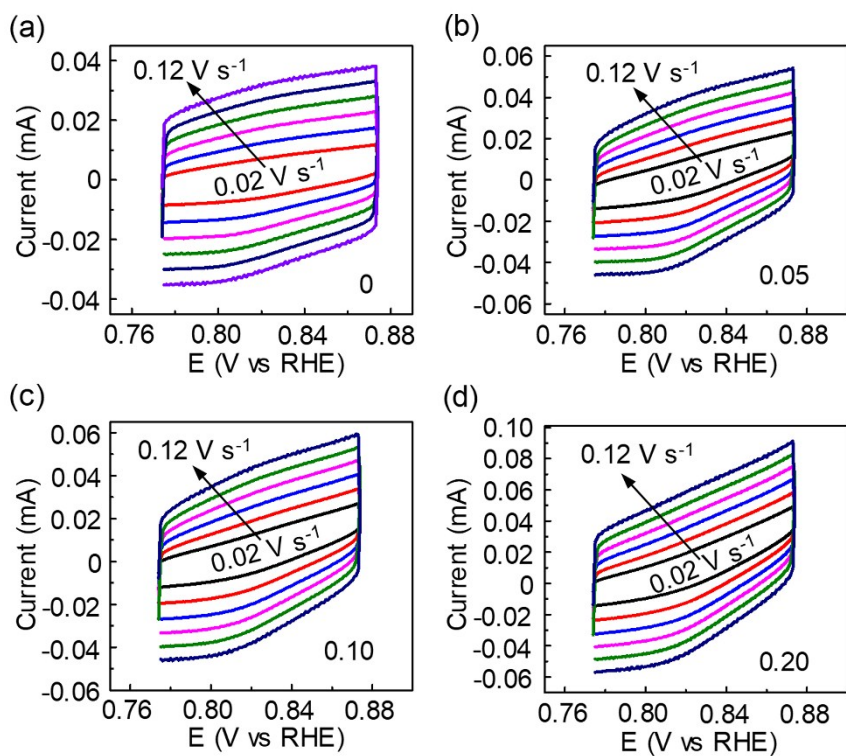

**Fig. S4** Cyclic voltammogram of curves of  $\text{Fe}_x\text{Ni}_{1-x}\text{S}_2$  with different scan rates (0.02, 0.04, 0.06, 0.08, 0.10, 0.12  $\text{V s}^{-1}$ ): (a)  $x = 0$ ; (b)  $x = 0.05$ ; (c)  $x = 0.10$ ; (d)  $x = 0.20$ .

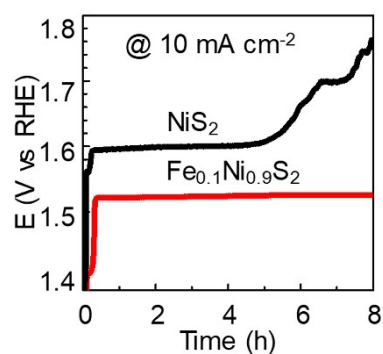

**Fig. S5** Chronopotentiometric curves for first 8 hours of  $\text{NiS}_2$  and  $\text{Fe}_{0.1}\text{Ni}_{0.9}\text{S}_2$  extracted from Fig. 3d.

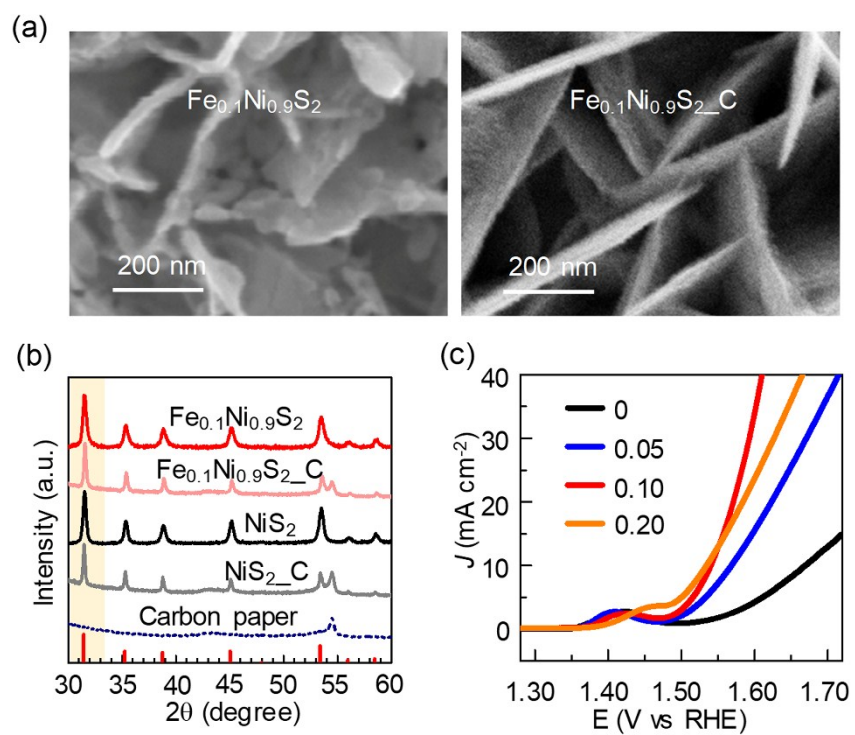

**Fig. S6** (a) SEM image of as-synthesized  $\text{Fe}_{0.1}\text{Ni}_{0.9}\text{S}_2$  powder (denoted as  $\text{Fe}_{0.1}\text{Ni}_{0.9}\text{S}_2$ ) and  $\text{Fe}_{0.1}\text{Ni}_{0.9}\text{S}_2$  prepared on carbon paper (denoted as  $\text{Fe}_{0.1}\text{Ni}_{0.9}\text{S}_2\text{-C}$ ). (b) XRD patterns of the catalysts powder (denoted as  $\text{NiS}_2$  and  $\text{Fe}_{0.1}\text{Ni}_{0.9}\text{S}_2$ ) and the catalysts prepared on carbon paper (denoted as  $\text{NiS}_2\text{-C}$  and  $\text{Fe}_{0.1}\text{Ni}_{0.9}\text{S}_2\text{-C}$ ). (c) Linear sweep voltammetry (LSV) polarization curves of  $\text{Fe}_x\text{Ni}_{1-x}\text{S}_2$  ( $x=0, 0.05, 0.10$  and  $0.20$ ) prepared on carbon paper.

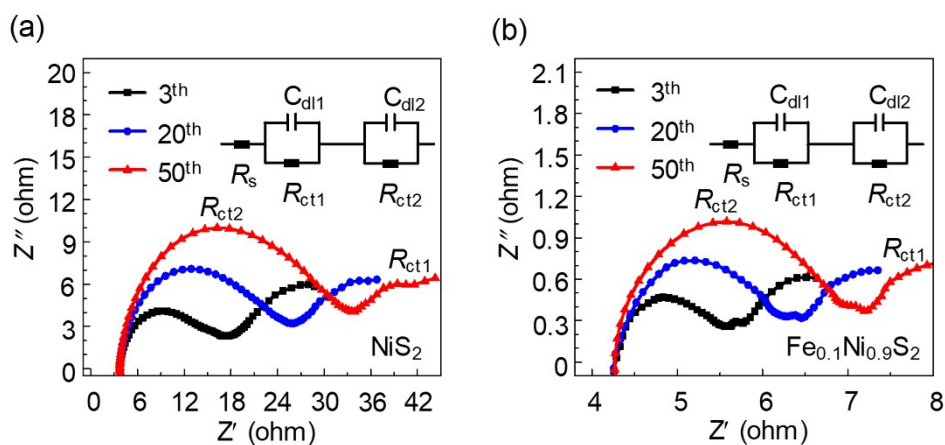

**Fig. S7** Nyquist plots of the EIS at potential of +1.63 V vs. RHE for (a) NiS<sub>2</sub> after 3, 20 and 50 cycles of OER measurements; (b) Fe<sub>0.1</sub>Ni<sub>0.9</sub>S<sub>2</sub> after 3, 20 and 50 cycles of OER measurements; Inset show the equivalent circuit for fitting the data, consisting of an electrolyte resistance ( $R_s$ ), a charge transfer resistance ( $R_{ct1}$ ) caused by electron transfer from electrolyte to the catalyst, and a resistance ( $R_{ct2}$ ) caused by electron transfer from Fe<sub>x</sub>Ni<sub>1-x</sub>OOH layer to Fe<sub>x</sub>Ni<sub>1-x</sub>S<sub>2</sub> layer.

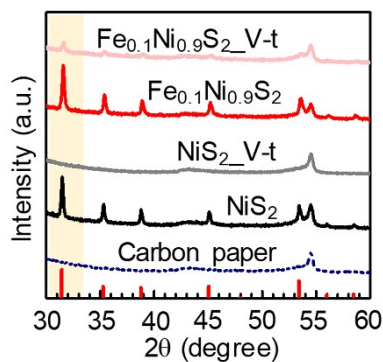

**Fig. S8** XRD patterns of the as-synthesized samples (denoted as NiS<sub>2</sub> and Fe<sub>0.1</sub>Ni<sub>0.9</sub>S<sub>2</sub>) and those of the samples after V-t test (denoted as NiS<sub>2</sub>\_V-t and Fe<sub>0.1</sub>Ni<sub>0.9</sub>S<sub>2</sub>\_V-t).

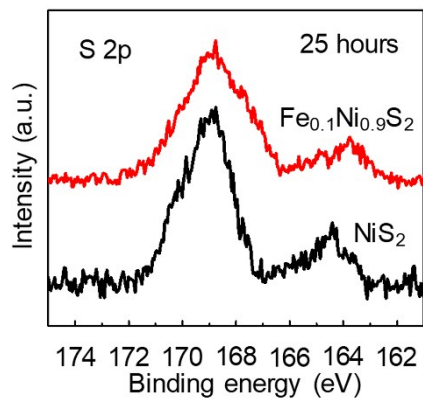

**Fig. S9** S 2p XPS spectra for NiS<sub>2</sub> and Fe<sub>0.1</sub>Ni<sub>0.9</sub>S<sub>2</sub> after 25 hours stability test.

**Table S2** Lattice parameters and the bond length of Fe<sub>x</sub>Ni<sub>1-x</sub>S<sub>2</sub> (x=0, 0.05, 0.10 and 0.20) and FeS<sub>2</sub>. The shorter Ni/Fe-S bond lengths suggest larger Ni/Fe-S binding energies, and thereby higher energy barrier to break Ni/Fe-S bonds for transformation of Fe<sub>x</sub>Ni<sub>1-x</sub>S<sub>2</sub> into Fe<sub>x</sub>Ni<sub>1-x</sub>OOH.

| x in Fe <sub>x</sub> Ni <sub>1-x</sub> S <sub>2</sub> | <i>a</i> (Å) | Ni-S (Å) | S-S (Å) | Fe-S (Å) |
|-------------------------------------------------------|--------------|----------|---------|----------|
| 0.00                                                  | 5.679        | 2.400    | 2.038   | -        |
| 0.05                                                  | 5.677        | 2.398    | 2.046   | -        |
| 0.10                                                  | 5.674        | 2.396    | 2.048   | -        |
| 0.20                                                  | 5.667        | 2.390    | 2.077   | -        |
| FeS <sub>2</sub> <sup>1</sup>                         | 5.404        | -        | 2.171   | 2.259    |

## Reference

1. M. Elliott, *J. Chem. Phys.*, 1960, **33**, 903-905.
